# Supplementary material for: Alleles of a gene differ in pleiotropy, often mediated through currency metabolite production, in E. coli and yeast metabolic simulations
Source: PubMed Central journal article supplement (PMC6250661; doi:10.1038/s41598-018-35092-1), 2018-11-22
Supplement: 41598_2018_35092_MOESM1_ESM.pdf [file 41598_2018_35092_MOESM1_ESM.pdf]

## Supplementary Information:

# Alleles of a gene differ in pleiotropy, often mediated through currency metabolite production, in *E. coli* and yeast metabolic simulations

---

Deya Alzoubi, Abdelmoneim Amer Desouki, Martin J. Lercher

## Contents

|                             |    |
|-----------------------------|----|
| Supplementary Figures ..... | 2  |
| Supplementary Tables .....  | 11 |

## Supplementary Figures

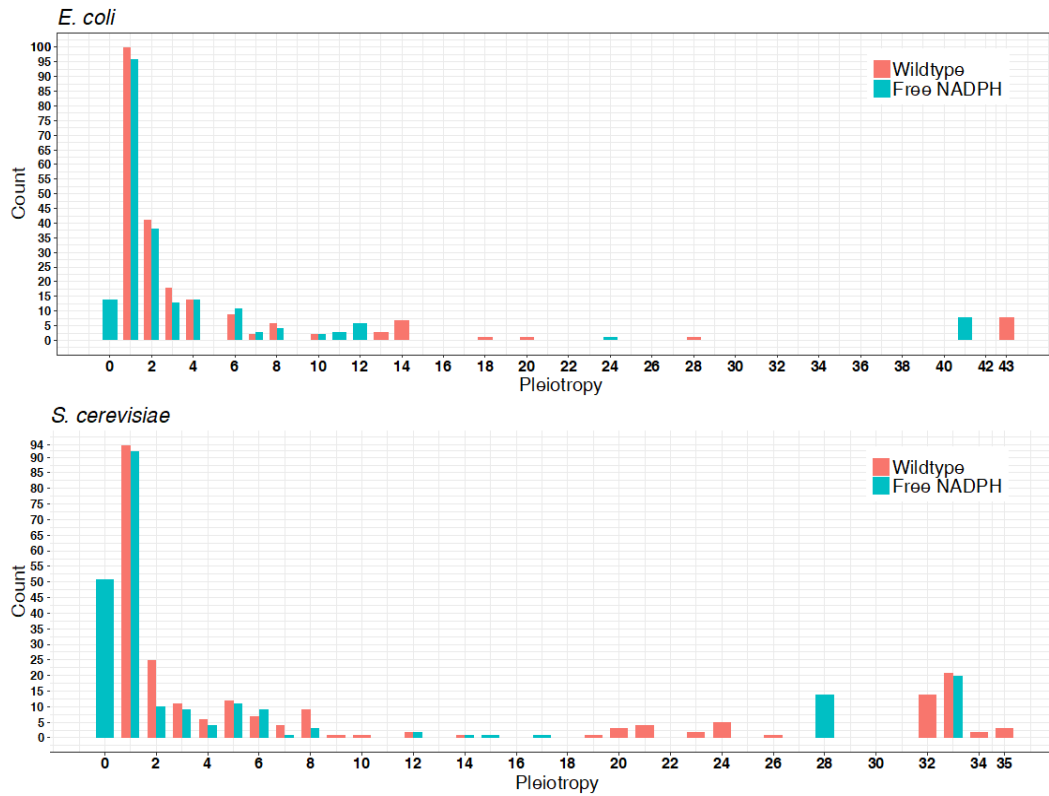

**Figure S1:** Distribution of the number of biomass components for which genes are essential even after allowing the mutant strain to adapt its protein expression (excluding genes with no effect on biomass production). The number of biomass components for which a given gene is essential is often reduced when NADPH is made freely available (cyan bars).

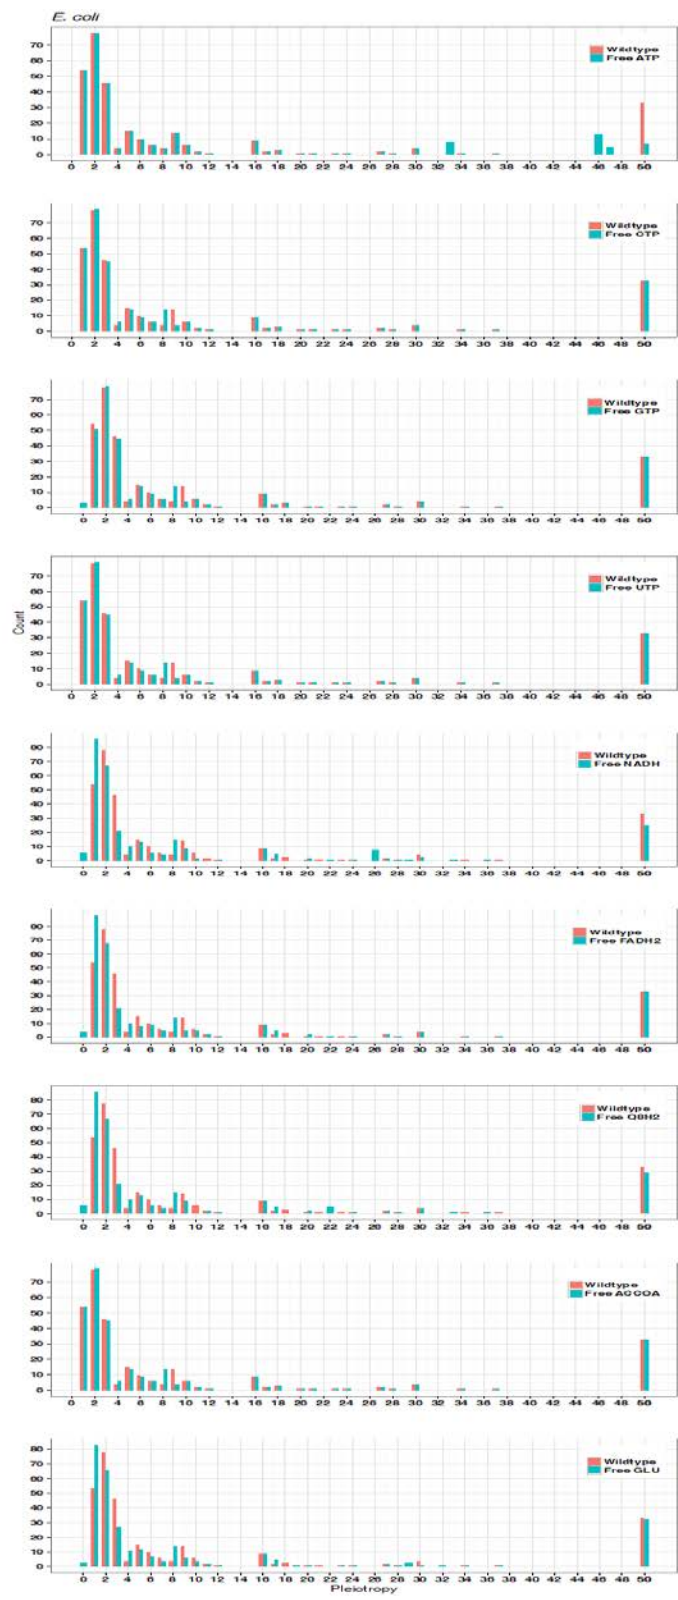

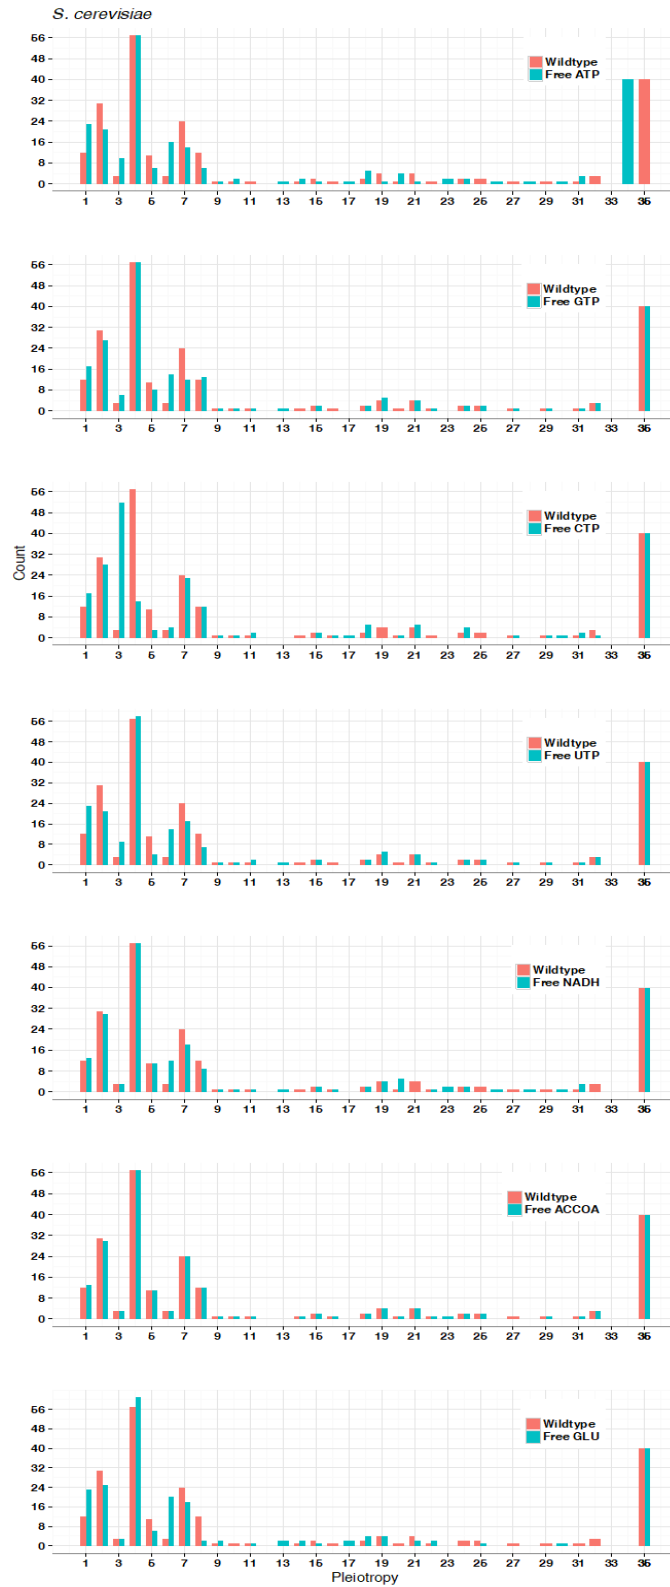

**Figure S2.** Distribution of pleiotropy for full gene knockouts. Pleiotropy is reduced for many *E. coli* and *S. cerevisiae* genes when different currency metabolites (one per panel) are made freely available.

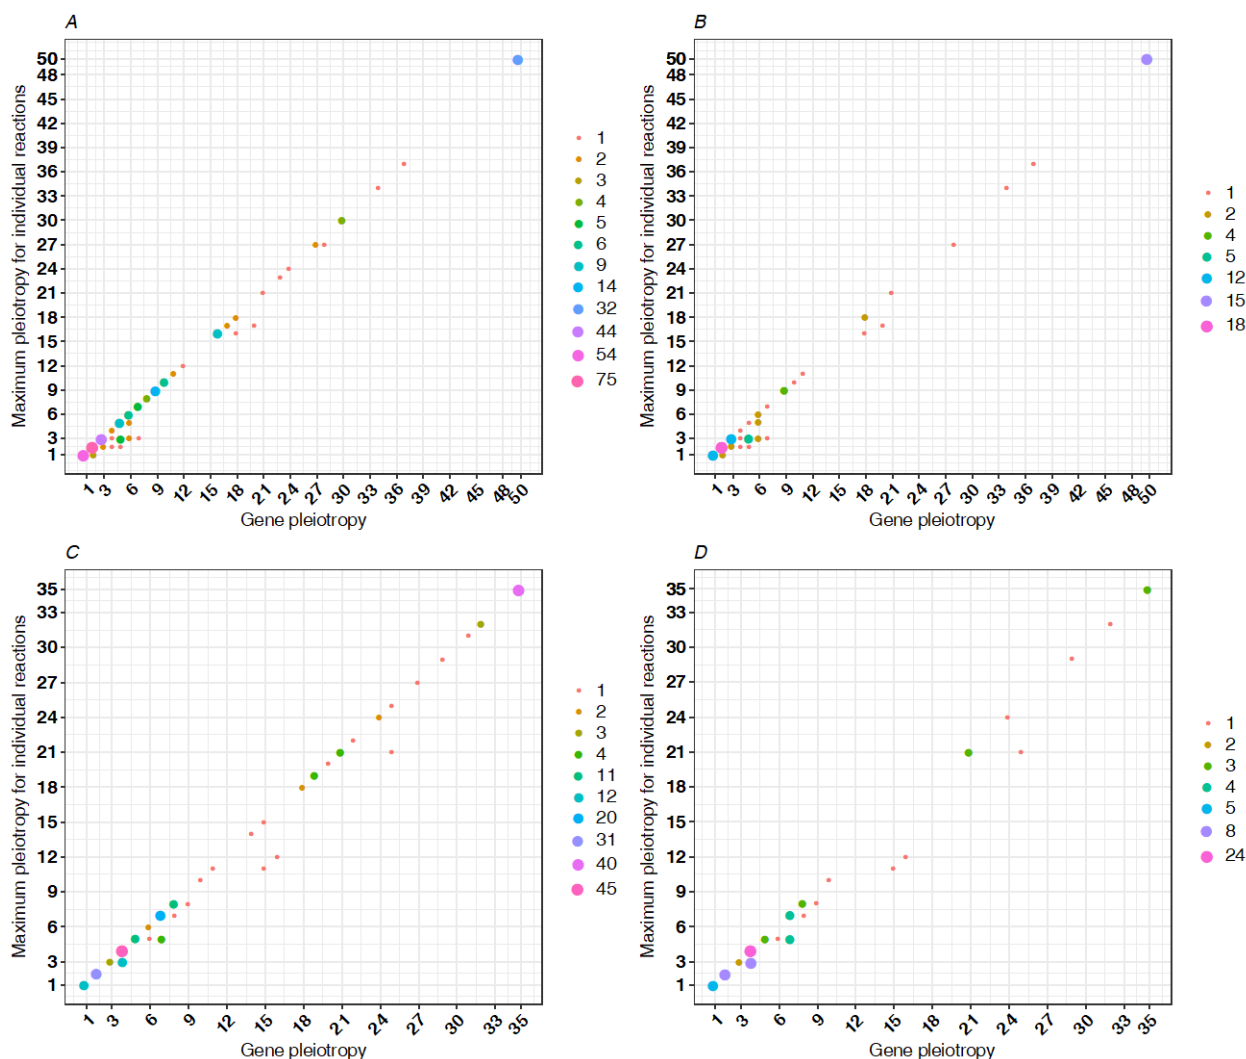

**Figure S3.** Comparison of gene pleiotropy (the number of biomass components affected by a full gene knockout) to the maximal pleiotropy observed when blocking the individual reactions for which this gene is essential. (A) *E. coli*, all genes; (B) *E. coli*, only genes essential for  $\geq 2$  reactions; (C) *S. cerevisiae*, all genes; (D) *S. cerevisiae*, only genes essential for  $\geq 2$  reactions. Dot size and color indicates the number of genes represented by each dot.



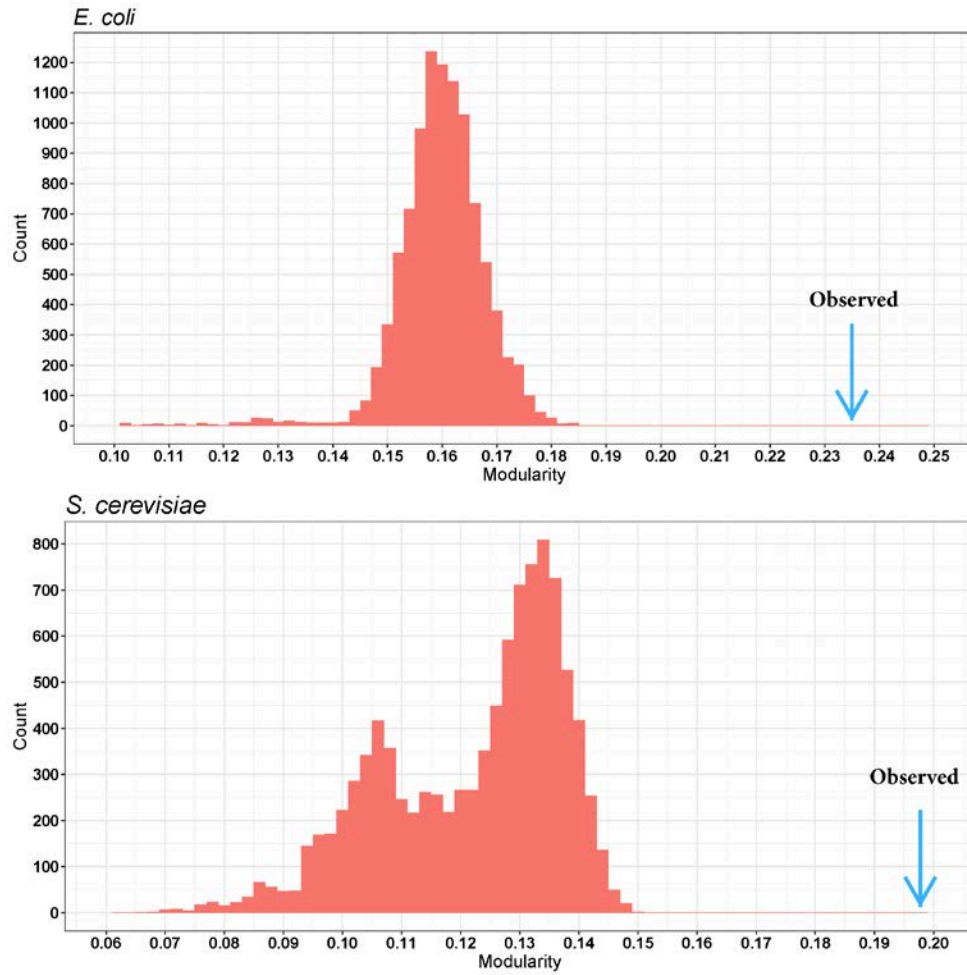

**Figure S5.** Observed modularity  $Q$  (as calculated with LP&BRIM, blue arrow) compared to the distribution of modularities obtained for pleiotropy networks with randomized links between genes and biomass components (red).

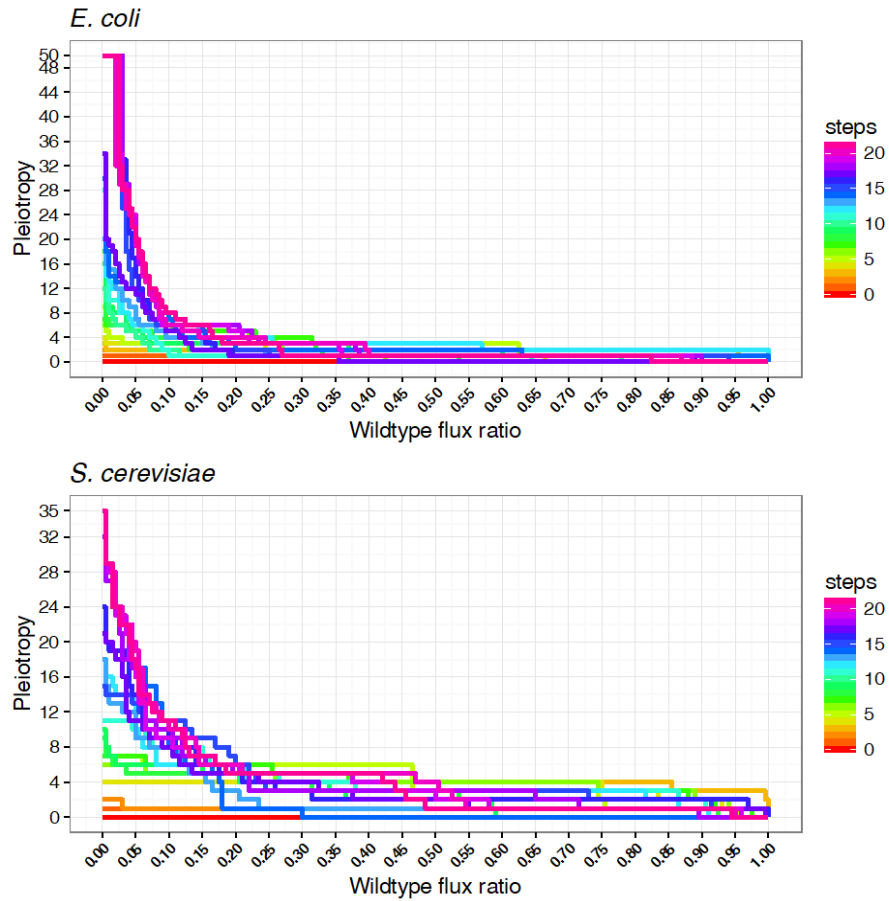

**Figure S6.** The pleiotropy of genes contributing to biomass production typically increases for increasingly debilitating mutations. Shown are curves for one randomly chosen gene for each value of the number of pleiotropy increases (steps).



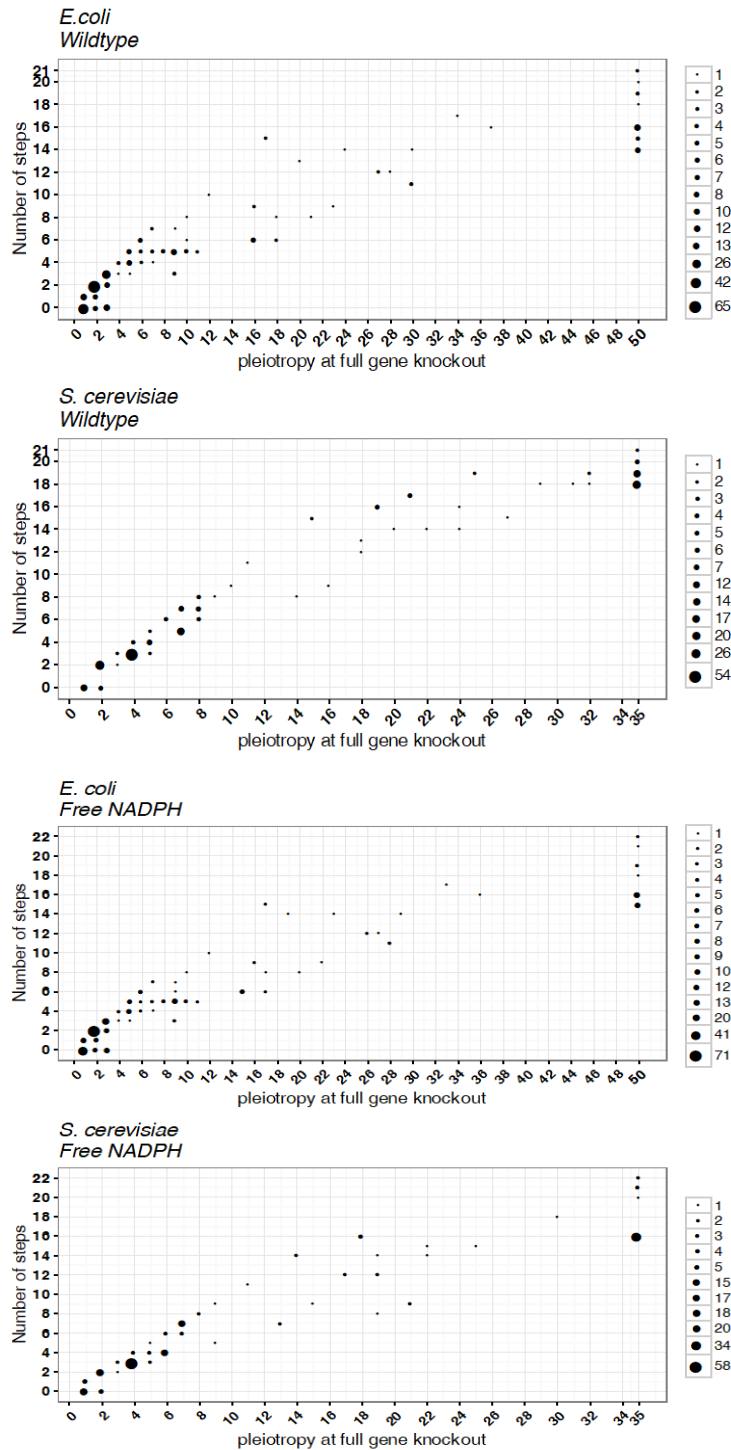

**Figure S7.** The number of step-wise increases in pleiotropy for increasingly debilitating mutations and the pleiotropy at full gene knockout are strongly correlated (Spearman's rank correlation when considering only genes contributing to biomass production, wildtype:  $\rho=0.926$  (*E. coli*) and  $\rho=0.986$  (*S. cerevisiae*); when making NADPH freely available:  $\rho=0.922$  (*E. coli*) and  $\rho=0.986$  (*S. cerevisiae*)). The diameter of each point is proportional to the number of genes with this combination of pleiotropy and step number.

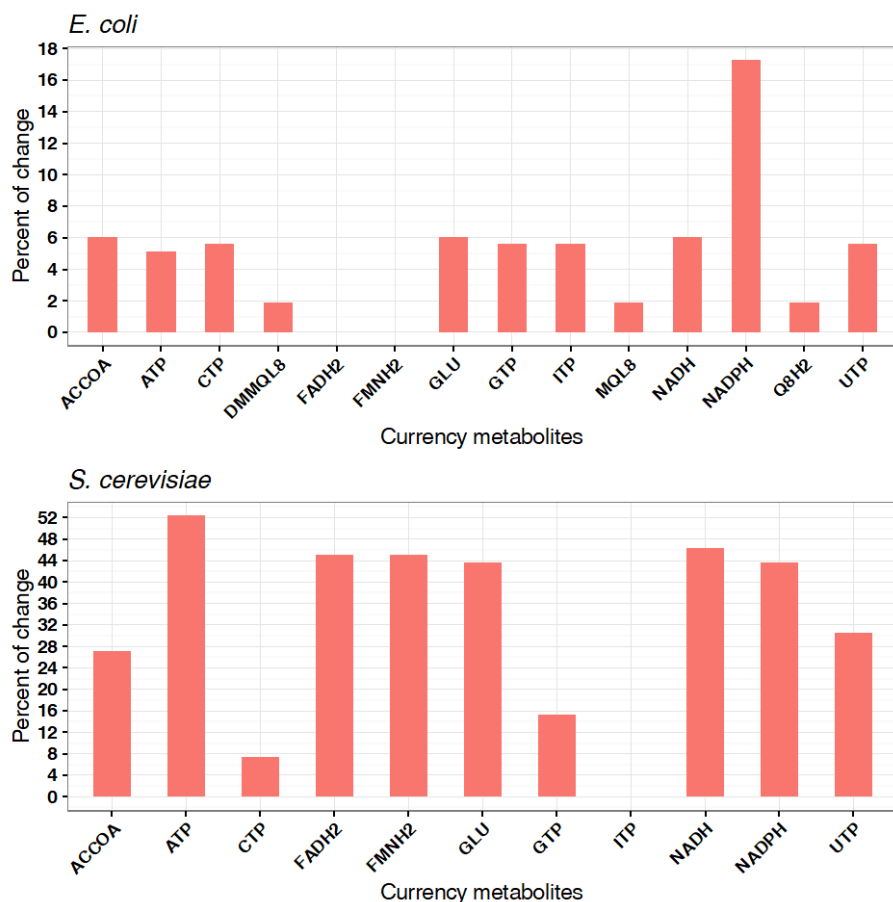

**Figure S8.** Percentage of genes for which free availability of a given currency metabolite reduces the number of biomass components for which this gene is essential even after allowing the mutant strain to adapt its protein expression to the altered gene content of its genome. Abbreviations: Adenosine triphosphate (ATP); Cytidine triphosphate (CTP); Guanosine triphosphate (GTP); Uridine triphosphate (UTP); Inosine triphosphate (ITP); Nicotinamide adenine dinucleotide (NADH); Nicotinamide adenine dinucleotide phosphate (NADPH); Flavin adenine dinucleotide reduced (FADH<sub>2</sub>); Reduced flavin mononucleotide (FMNH<sub>2</sub>); Ubiquinol-8 (Q8H<sub>2</sub>); Menaquinol 8 (MQL8); 2-Demethylmenaquinol 8 (DMMQL8); Acetyl-CoA (ACCOA); L-Glutamate (GLU).

## Supplementary Tables

**Table S1.** Essential Biomass components in *E. coli* (excluding inorganic ions, H<sub>2</sub>O, and products of the biomass reaction)

| Components    |                |
|---------------|----------------|
| ala_DASH_L[c] | gtp[c]         |
| arg_DASH_L[c] | utp[c]         |
| asn_DASH_L[c] | murein5px4p[p] |
| asp_DASH_L[c] | kdo2lipid4[e]  |
| cys_DASH_L[c] | pe160[c]       |
| gln_DASH_L[c] | pe160[p]       |
| glu_DASH_L[c] | pe161[c]       |
| gly[c]        | pe161[p]       |
| his_DASH_L[c] | 10fthf[c]      |
| ile_DASH_L[c] | 2ohph[c]       |
| leu_DASH_L[c] | amet[c]        |
| lys_DASH_L[c] | btn[c]         |
| met_DASH_L[c] | coa[c]         |
| phe_DASH_L[c] | fad[c]         |
| pro_DASH_L[c] | mlthf[c]       |
| ser_DASH_L[c] | nad[c]         |
| thr_DASH_L[c] | nadp[c]        |
| trp_DASH_L[c] | pheme[c]       |
| tyr_DASH_L[c] | pydx5p[c]      |
| val_DASH_L[c] | ribflv[c]      |
| datp[c]       | sheme[c]       |
| dctp[c]       | thf[c]         |
| dgtp[c]       | thmpp[c]       |
| dttp[c]       | udcpdp[c]      |
| ctp[c]        | atp[c]         |

**Table S2.** Essential Biomass components in *S. cerevisiae* (excluding inorganic ions, H<sub>2</sub>O, and products of the biomass reaction)

| <b>Components</b>                         |                             |
|-------------------------------------------|-----------------------------|
| ATP [cytoplasm]                           | L-proline [cytoplasm]       |
| (1->3)-beta-D-glucan<br>lipid [cytoplasm] | L-phenylalanine [cytoplasm] |
| mannan [cytoplasm]                        | L-tyrosine [cytoplasm]      |
| glycogen [cytoplasm]                      | L-histidine [cytoplasm]     |
| L-alanine [cytoplasm]                     | UMP [cytoplasm]             |
| L-glycine [cytoplasm]                     | AMP [cytoplasm]             |
| L-glutamate [cytoplasm]                   | GMP [cytoplasm]             |
| L-glutamine [cytoplasm]                   | CMP [cytoplasm]             |
| L-valine [cytoplasm]                      | L-methionine [cytoplasm]    |
| L-serine [cytoplasm]                      | L-cysteine [cytoplasm]      |
| L-leucine [cytoplasm]                     | L-tryptophan [cytoplasm]    |
| L-lysine [cytoplasm]                      | trehalose [cytoplasm]       |
| L-threonine [cytoplasm]                   | dAMP [cytoplasm]            |
| L-asparagine [cytoplasm]                  | dTMP [cytoplasm]            |
| L-aspartate [cytoplasm]                   | dCMP [cytoplasm]            |
| L-isoleucine [cytoplasm]                  | dGMP [cytoplasm]            |
| L-arginine [cytoplasm]                    | riboflavin [cytoplasm]      |

**Table S3.** Currency metabolites and the corresponding supply reactions

| Name                                        | Abbrev.            | Chemical equation                                                                                               | <i>E. coli</i> model equation                         | #Reactions in <i>E. coli</i> | <i>S. cerevisiae</i> model equation    | #Reactions in <i>S. cerevisiae</i> |
|---------------------------------------------|--------------------|-----------------------------------------------------------------------------------------------------------------|-------------------------------------------------------|------------------------------|----------------------------------------|------------------------------------|
| Adenosine triphosphate                      | ATP                | ATP + H <sub>2</sub> O --> ADP + H(+) + Phosphate                                                               | atp[c] + h2o[c] --> adp[c] + h(+)[c] + pi[c]          | 359                          | 0434 + 0803 --> 0394 + 0794 + 1322     | 158                                |
| Cytidine triphosphate                       | CTP                | CTP + H <sub>2</sub> O --> CDP + H(+) + Phosphate                                                               | ctp[c] + h2o[c] --> cdp[c] + h(+)[c] + pi[c]          | 18                           | 0539 + 0803 --> 0467 + 0794 + 1322     | 13                                 |
| Guanosine triphosphate                      | GTP                | GTP + H <sub>2</sub> O --> GDP + H(+) + Phosphate                                                               | gtp[c] + h2o[c] --> gdp[c] + h(+)[c] + pi[c]          | 25                           | 0785 + 0803 --> 0739 + 0794 + 1322     | 13                                 |
| Uridine triphosphate                        | UTP                | UTP + H <sub>2</sub> O --> UDP + H(+) + Phosphate                                                               | utp[c] + h2o[c] --> udp[c] + h(+)[c] + pi[c]          | 8                            | 1559 + 0803 --> 1538 + 0794 + 1322     | 11                                 |
| Inosine triphosphate                        | ITP                | ITP + H <sub>2</sub> O --> IDP + H(+) + Phosphate                                                               | itp[c] + h2o[c] --> idp[c] + h(+)[c] + pi[c]          | 4                            | 0950 + 0803 --> 0846 + 0794 + 1322     | 3                                  |
| Nicotinamide adenine dinucleotide           | NADH               | Nicotinamide adenine dinucleotide - reduced<br>--> H(+) + Nicotinamide adenine dinucleotide                     | nadh[c] --> h(+)[c] + nad[c]                          | 119                          | 1203 --> 0794 + 1198                   | 36                                 |
| Nicotinamide adenine dinucleotide phosphate | NADPH              | Nicotinamide adenine dinucleotide phosphate - reduced<br>--> H(+) + Nicotinamide adenine dinucleotide phosphate | nadph[c] --> h(+)[c] + nadp[c]                        | 97                           | 1212 --> 0794 + 1207                   | 58                                 |
| Flavin adenine dinucleotide reduced         | FADH <sub>2</sub>  | Flavin adenine dinucleotide reduced<br>--> 2 H(+) + Flavin adenine dinucleotide oxidized                        | fadh2[c] --> 2 h(+)[c] + fad[c]                       | 25                           | 0689 --> 2 (0794) + 0687               | 2                                  |
| Reduced flavin mononucleotide               | FMNH <sub>2</sub>  | Reduced FMN --> 2 H(+) + FMN                                                                                    | fmnh2[c] --> 2 h(+)[c] + fmn[c]                       | 13                           | 0717 --> 2 (0794) + 0714               | 3                                  |
| Ubiquinol-8                                 | Q8H <sub>2</sub>   | Ubiquinol-8 --> 2 H(+) + Ubiquinone-8                                                                           | q8h2[c] --> 2 h(+)[c] + q8[c]                         | 24                           | NA                                     | NA                                 |
| Menaquinol 8                                | MQL <sub>8</sub>   | Menaquinol 8 --> 2 H(+) + Menaquinone 8                                                                         | mql8[c] --> 2 h(+)[c] + mqn8[c]                       | 25                           | NA                                     | NA                                 |
| 2-Demethylmenaquinol 8                      | DMMQL <sub>8</sub> | 2-Demethylmenaquinol 8<br>--> 2 H(+) + 2-Demethylmenaquinone 8                                                  | 2dmmql8[c] --> 2 h(+)[c] + 2dmmq8[c]                  | 14                           | NA                                     | NA                                 |
| Acetyl-CoA                                  | ACCOA              | H <sub>2</sub> O + Acetyl-CoA --> H(+) + Acetate + Coenzyme A                                                   | h2o[c] + accoa[c] --> h(+)[c] + ac[c] + coa[c]        | 37                           | 0803 + 0373 --> 0794 + 0362 + 0529     | 44                                 |
| L-Glutamate                                 | GLU                | L-Glutamate + H <sub>2</sub> O --> 2-Oxoglutarate + Ammonium + 2 H(+)                                           | glu_dash_[c] + h2o[c] --> akgl[c] + nh4[c] + 2h(+)[c] | 49                           | 0991 + 0803 --> 0180 + 0419 + 2 (0794) | 44                                 |
